# Supplementary material
Source: PubMed Central journal article supplement (PMC8024371)

## Supplementary Data

### Step patterns (%)

1. Ca

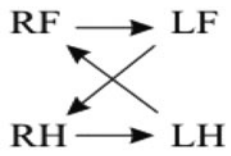

2. Cb

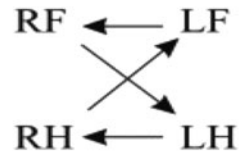

3. Aa

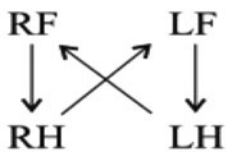

4. Ab

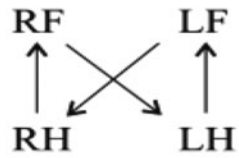

SUPPLEMENTARY FIG. S1. Step sequence patterns.

Supplement: Supp_Fig1.pdf [file Supp_Fig1.pdf]
